# Supplementary material for: Improved thermoelectric power factor and conversion efficiency of perovskite barium stannate
Source: Royal Society of Chemistry journal article supplement (doi:10.1039/c7ra05193j), 2017-01-01
Supplement: c7ra05193j1.pdf [file c7ra05193j1.pdf]

## Supplementary Information

### Improved thermoelectric power factor and conversion efficiency of perovskite barium stannate

Jun Li,<sup>ab</sup> Zuju Ma,<sup>a</sup> Rongjian Sa,<sup>a</sup> Kechen Wu<sup>\*a</sup>

<sup>a</sup> *State Key Laboratory of Structural Chemistry, Fujian Institute of Research on the  
Structure of Matter, Chinese Academy of Sciences, Fuzhou 350002, People's  
Republic of China.*

<sup>b</sup> *University of Chinese Academy of Sciences, Beijing 100049, People's Republic of  
China*

---

<sup>\*</sup> *Corresponding author.* Tel: +86-591-83792600. Fax: +86 591 83792932. E-mail address: wkc@fjirsm.ac.cn.

To examine the practical application of *n*-type doped BaSnO<sub>3</sub> in thermoelectric devices, four different *p*-type popular thermoelectric materials including BiCuSeO, Si–Ge alloy, PbTe based compounds and half-Heusler FeNbSb are selected to assemble with *n*-type doped BaSnO<sub>3</sub> to form the high temperature thermoelectric modulus.<sup>1–4</sup> It is worthy to note that the disparity compatibility factor of *n*-type doped BaSnO<sub>3</sub> is matched with that of the four *p*-type samples to assemble the thermoelectric modules over the considered operating temperature range (300 K to 1200 K), as shown in Fig. S1(a). With  $T_c$  fixes at 300 K and  $T_h$  varies from 400 K to 1200 K, the thermoelectric couples compromising *n*-type BaSnO<sub>3</sub> and *p*-type thermoelectric materials can be assembled. The ideal conversion efficiency is simulated and the results are plotted in Fig. S1(b). The couple between *n*-type doped BaSnO<sub>3</sub> and *p*-type doped FeNbSb exhibits the optimal conversion efficiency. Under the condition of temperature difference is 900 K (hot/cold-side temperature of 1200 K/300 K), the module produces a maximum efficiency of 9.7%, which is even higher than that of commercial thermoelectric modules base on bulk Bi<sub>2</sub>Te<sub>3</sub>.<sup>5</sup> The high conversion efficiency is ascribed to excellent thermoelectric performance as well as the thermal stability of these two samples at high temperature.

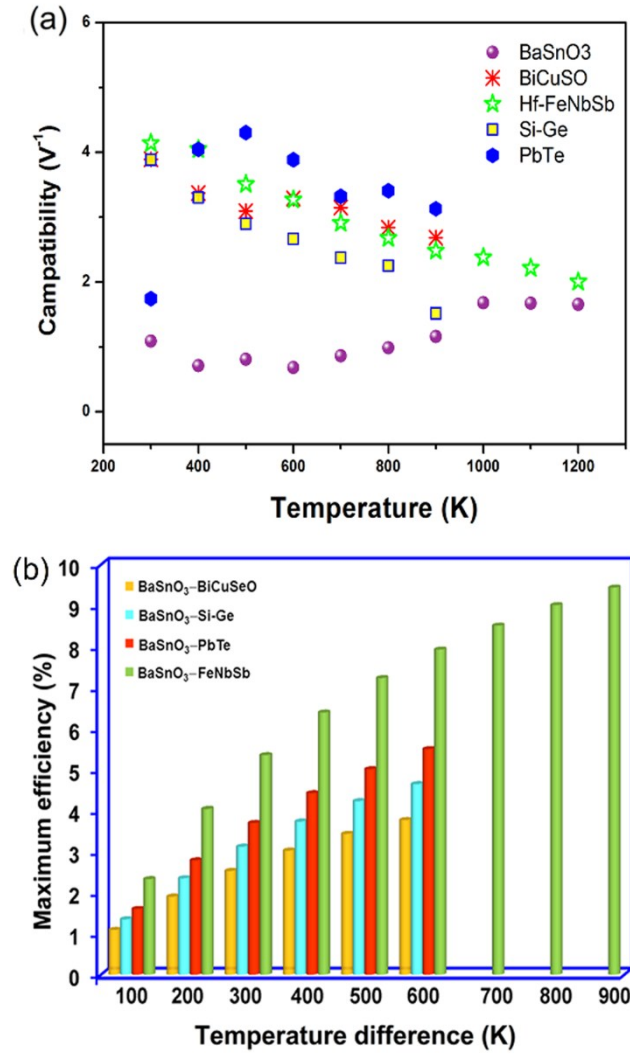

**Fig. S1** (a) Compatibility factor of  $n$ -type BaSnO<sub>3</sub> and four  $p$ -type thermoelectric segments. (b) The ideal maximum efficiency of four types of thermoelectric couples assembled by  $n$ -type BaSnO<sub>3</sub> and  $p$ -type BiCuSeO, Si-Ge alloy, PbTe based sample and Hf-doped FeNbSb.

## References:

1. L. D. Zhao, J. Q. He, D. Berardan, Y. H. Lin, J. F. Li, C. W. Nan and N. Dragoe, *Energy Environ. Sci.*, 2014, **7**, 2900–2924.
2. G. Bb Joshi, H. Lee, Y. Lan, X. Wang, G. Zhu, D. Wang, G. Chen, *Nano Lett.*, 2015, **8**, 4670–674.
3. Y. Z. Pei, A. LaLonde, S. Iwanaga, G. J. Snyder, *Energy Environ. Sci.*, 2011, **4**,

2085–2089.

4. C. G. Fu, S. Q. Bai, Y. T. Liu, Y. S. Tang, L. D. Chen, X. B. Zhao, T. J. Zhu, *Nat. Commun.*, 2015, **6**, 8144.
5. G. J. Snyder, J. R. Lim, C. K. Huang, *Nat. Mater.*, 2003, **2**, 528–531.
